# Supplementary material for: Adverse Events of COVID-19 Vaccination among the Saudi Population: A Systematic Review and Meta-Analysis
Source: MDPI journal article supplement (doi:10.3390/vaccines10122089), 2022-12-07
Supplement: s1 [file s1]

Supplementary Table S1: AEs among all vaccinated patients, Pfizer vaccine, and AstraZeneca vaccine

| AEs              |                             |                | Prevalence/RR (95% CI) | Studies | Heterogeneity  |
|------------------|-----------------------------|----------------|------------------------|---------|----------------|
| Overall AEs      | Pooled data                 | All Vaccinated | 0.404 (0.064 – 0.870)  | 13      | 99%; <0.001    |
|                  | Data collection             | Online survey  | 0.625 (0.521 – 0.720)  | 8       | 98%; <0.001    |
|                  |                             | Questionnaire  | 0.136 (0.0 - 0.997)    | 2       | 99%; <0.001    |
|                  |                             | Others         | 0.137 (0.002 – 0.928)  | 3       | 99%; <0.001    |
|                  | Vaccine                     | Both           | 0.437 (0.019 – 0.969)  | 7       | 99%; <0.001    |
|                  |                             | Pfizer         | 0.370 (0.051 – 0.864)  | 5       | 99%; <0.001    |
|                  |                             | AstraZeneca    | 0.347 (0.324 – 0.371)  | 1       | NA             |
| Fever            | All Vaccinated              |                | 0.342 (0.264 – 0.430)  | 6       | 95%; <0.001    |
|                  | Pfizer                      |                | 0.183 (0.143 – 0.230)  | 9       | 95.05%; <0.001 |
|                  | AstraZeneca                 |                | 0.572 (0.427 – 0.706)  | 8       | 99.30%; <0.001 |
|                  | Pfizer vs. AstraZeneca (RR) |                | 0.36 [0.24, 0.54]      | 6       | 98%; p<0.001   |
| Headache         | All Vaccinated              |                | 0.339 (0.270 – 0.415)  | 5       | 93.28; <0.001  |
|                  | Pfizer                      |                | 0.259 (0.228 – 0.293)  | 11      | 92.37; <0.001  |
|                  | AstraZeneca                 |                | 0.454 (0.369 – 0.541)  | 7       | 97.36; <0.001  |
|                  | Pfizer vs. AstraZeneca (RR) |                | 0.47 (0.37 - 0.60)     | 6       | 93%; <0.001    |
| GIT symptoms     | Pfizer                      |                | 0.080 (0.018 – 0.287)  | 2       | 97.45%; <0.001 |
|                  | AstraZeneca                 |                | 0.100 (0.061 – 0.159)  | 4       | 97.89%; <0.001 |
|                  | Pfizer vs. AstraZeneca (RR) |                | 0.89 (0.81 - 0.98)     | 1       | NA             |
| Diarrhea         | All Vaccinated              |                | 0.054 (0.017 – 0.161)  | 2       | 49.7%; 0.158   |
|                  | Pfizer                      |                | 0.051 (0.037 – 0.068)  | 4       | 78.67%; 0.003  |
|                  | AstraZeneca                 |                | 0.096 (0.082 – 0.111)  | 2       | 0%; 0.462      |
|                  | Pfizer vs. AstraZeneca (RR) |                | 0.63 (0.50 - 0.79)     | 2       | 0%; 0.52       |
| Dizziness        | All Vaccinated              |                | 0.081 (0.058 – 0.113)  | 2       | 0%; 0.904      |
|                  | Pfizer                      |                | 0.201 (0.114 – 0.330)  | 5       | 98.35%; <0.001 |
|                  | AstraZeneca                 |                | 0.240 (0.047 – 0.666)  | 2       | 84.69%; 0.011  |
|                  | Pfizer vs. AstraZeneca (RR) |                | 0.49 (0.44 - 0.54)     | 2       | 0%; 0.73       |
| Chest pain       | All Vaccinated              |                | 0.099 (0.090 – 0.108)  | 1       | NA             |
|                  | Pfizer                      |                | 0.083 (0.050 – 0.134)  | 3       | 91.13%; <0.001 |
|                  | AstraZeneca                 |                | 0.133 (0.117 – 0.151)  | 1       | NA             |
|                  | Pfizer vs. AstraZeneca (RR) |                | 0.59 (0.49 – 0.71)     | 1       | NA             |
| Dyspnea          | All Vaccinated              |                | 0.036 (0.023 – 0.055)  | 4       | 60%; 0.057     |
|                  | Pfizer                      |                | 0.069 (0.040 – 0.117)  | 4       | 93%; <0.001    |
|                  | AstraZeneca                 |                | 0.037 (0.029 – 0.046)  | 3       | 0%; 0.56       |
|                  | Pfizer vs. AstraZeneca (RR) |                | 1.68 (1.24 – 2.28)     | 2       | 0%; 0.51       |
| Generalized pain | All Vaccinated              |                | 0.019 (0.003 – 0.124)  | 1       | NA             |
|                  | Pfizer                      |                | 0.071 (0.008 – 0.413)  | 3       | 98%; <0.001    |
|                  | AstraZeneca                 |                | 0.260 (0.010 – 0.923)  | 2       | 91%; <0.001    |
|                  | Pfizer vs. AstraZeneca (RR) |                | 0.78 (0.76 – 0.81)     | 1       | NA             |
| Myalgia          | All Vaccinated              |                | 0.187 (0.036 – 0.586)  | 2       | 98%; <0.001    |
|                  | Pfizer                      |                | 0.356 (0.286 – 0.432)  | 1       | NA             |
|                  | AstraZeneca                 |                | 0.701 (0.678 – 0.723)  | 2       | 86%; <0.001    |
|                  | Pfizer vs. AstraZeneca (RR) |                | 0.94 (0.71 – 1.25)     | 1       | NA             |
| Joint Pain       | All Vaccinated              |                | 0.110 (0.039 – 0.274)  | 4       | 98%; <0.001    |
|                  | Pfizer                      |                | 0.270 (0.254 – 0.286)  | 3       | 97%; <0.001    |
|                  | AstraZeneca                 |                | 0.556 (0.535 – 0.581)  | 1       | NA             |

|                                                       |                             |                       |   |              |
|-------------------------------------------------------|-----------------------------|-----------------------|---|--------------|
|                                                       | Pfizer vs. AstraZeneca (RR) | 0.51 (0.47 – 0.55)    | 1 | NA           |
| Abdominal Pain                                        | All Vaccinated              | 0.079 (0.072 – 0.088) | 1 | NA           |
|                                                       | Pfizer                      | 0.070 (0.064 – 0.076) | 3 | 0%; 0.425    |
|                                                       | AstraZeneca                 | 0.095 (0.081 – 0.110) | 1 | NA           |
|                                                       | Pfizer vs. AstraZeneca (RR) | 0.74 (0.60 – 0.91)    | 1 | NA           |
| Numbness                                              | Pfizer                      | 0.065 (0.036 – 0.116) | 2 | 62%; 0.10    |
|                                                       | AstraZeneca                 | 0.085 (0.064 – 0.112) | 1 | NA           |
| Vomiting                                              | All Vaccinated              | 0.169 (0.139 – 0.204) | 1 | NA           |
|                                                       | Pfizer                      | 0.043 (0.014 – 0.120) | 5 | 97%; <0.001  |
|                                                       | AstraZeneca                 | 0.184 (0.149 – 0.226) | 1 | NA           |
|                                                       | Pfizer vs. AstraZeneca (RR) | 0.67 (0.40 – 1.11)    | 1 | NA           |
| Palpitations / A fast heartbeat                       | All Vaccinated              | 0.111 (0.102 – 0.121) | 1 | NA           |
|                                                       | Pfizer                      | 0.065 (0.054 – 0.079) | 4 | 63%; 0.041   |
|                                                       | AstraZeneca                 | 0.049 (0.007 – 0.261) | 3 | 99%; <0.001  |
|                                                       | Pfizer vs. AstraZeneca (RR) | 0.53 (0.34 – 0.84)    | 2 | 83%; 0.02    |
| Cardiovascular events                                 | Pfizer vs. AstraZeneca (RR) | 0.53 (0.25 – 1.12)    | 1 | NA           |
| Upper respiratory tract symptoms                      | Pfizer vs. AstraZeneca (RR) | 1.71 (1.47 – 1.99)    | 1 | NA           |
| Lower respiratory tract symptoms                      | Pfizer vs. AstraZeneca (RR) | 1.03 (0.90 – 1.18)    | 1 | NA           |
| Lymphadenopathy                                       | Pfizer                      | 0.025 (0.010 – 0.063) | 3 | 87% <0.001   |
|                                                       | AstraZeneca                 | 0.006 (0.005 – 0.008) | 2 | 77%; 0.033   |
|                                                       | Pfizer vs. AstraZeneca (RR) | 8.32 (6.16 - 11.22)   | 1 | NA           |
| Wheezing                                              | Pfizer vs. AstraZeneca (RR) | 0.040 (0.034 – 0.046) | 2 | 56%; 0.129   |
| Pain at the site of injection                         | All Vaccinated              | 0.448 (0.208 – 0.715) | 6 | 99%; <0.001  |
|                                                       | Pfizer                      | 0.595 (0.442 – 0.731) | 8 | 99%; <0.001  |
|                                                       | AstraZeneca                 | 0.548 (0.260 – 0.808) | 5 | 99%; <0.001  |
|                                                       | Pfizer vs. AstraZeneca (RR) | 0.84 (0.60 – 1.18)    | 4 | 90%; <0.001  |
| Injection site swelling                               | Pfizer                      | 0.120 (0.070 – 0.199) | 5 | 97%; <0.001  |
|                                                       | AstraZeneca                 | 0.250 (0.230 – 0.273) | 1 | NA           |
|                                                       | Pfizer vs. AstraZeneca (RR) | 1.04 (0.93 – 1.16)    | 1 | NA           |
| Hospitalization due to side effects                   | Pfizer                      | 0.086 (0.065 – 0.112) | 1 | NA           |
|                                                       | AstraZeneca                 | 0 (0-0.005)           | 1 | NA           |
| Visited the emergency department post vaccination     | Pfizer vs. AstraZeneca (RR) | 0.68 (0.04 – 10.24)   | 1 | NA           |
| Felt the need for analgesia or antipyretic medication | Pfizer vs. AstraZeneca (RR) | 0.72 (0.48 – 1.07)    | 1 | NA           |
| General allergic reactions                            | Pfizer vs. AstraZeneca (RR) | 1.62 (1.40 – 1.87)    | 1 | NA           |
| High Blood pressure                                   | Pfizer                      | 0.010 (0.001 - 0.135) | 2 | 99%; <0.001  |
|                                                       | Pfizer vs. AstraZeneca (RR) | 3.02 (0.14 – 62.80)   | 1 | NA           |
| Pain in testis                                        | Pfizer vs. AstraZeneca (RR) | 0.20 (0.01 – 4.93)    | 1 | NA           |
| Fatigue                                               | All Vaccinated              | 0.516 (0.356 – 0.673) | 3 | 97% <0.001   |
|                                                       | Pfizer                      | 0.287 (0.207 – 0.381) | 7 | 98%%; <0.001 |
|                                                       | AstraZeneca                 | 0.601 (0.312 – 0.833) | 4 | 99%; <0.001  |
|                                                       | Pfizer vs. AstraZeneca (RR) | 0.57 (0.47 – 0.69)    | 2 | 58% 0.12     |
| Nausea                                                | All Vaccinated              | 0.057 (0.020 – 0.150) | 4 | 93%%; <0.001 |
|                                                       | Pfizer                      | 0.073 (0.035 – 0.144) | 7 | 94%; <0.001  |
|                                                       | AstraZeneca                 | 0.076 (0.020 – 0.256) | 3 | 89%; <0.001  |
|                                                       | Pfizer vs. AstraZeneca (RR) | 0.29 (0.03 – 3.07)    | 2 | 66% 0.08     |
| Chills                                                | All Vaccinated              | 0.20 (0.158 – 0.249)  | 5 | 85%; <0.001  |

|             |                             |                       |   |             |
|-------------|-----------------------------|-----------------------|---|-------------|
|             | Pfizer                      | 0.102 (0.069 – 0.147) | 6 | 91%; <0.001 |
|             | AstraZeneca                 | 0.40 (0.21 – 0.625)   | 4 | 99%; <0.001 |
|             | Pfizer vs. AstraZeneca (RR) | 0.41 (0.20 – 0.86)    | 3 | 99%; <0.001 |
| Sore throat | All Vaccinated              | 0.017 (0.001 – 0.256) | 2 | 98%; <0.001 |
|             | Pfizer                      | 0.014 (0.001 – 0.152) | 3 | 98%; <0.001 |
|             | AstraZeneca                 | 0.009 (0.00 – 0.169)  | 2 | 96%; <0.001 |
|             | Pfizer vs. AstraZeneca (RR) | 2.41 (0.68 – 8.54)    | 1 | NA          |
